# Supplementary material for: Chemical and pharmaceutical evaluation of the relationship between triazole linkers and pore size on cyclodextrin–calixarene nanosponges used as carriers for natural drugs
Source: Royal Society of Chemistry journal article supplement (doi:10.1039/c6ra06143e), 2016-01-01
Supplement: c6ra06143e1.pdf [file c6ra06143e1.pdf]

## Supporting information

### Chemical and pharmaceutical evaluations of relationship between triazole linkers and pore sizes on cyclodextrin-calixarene nanosponges used as carrier for natural drugs.

M. Massaro, V. Cinà, M. Labbozzetta, G. Lazzara, P. Lo Meo,\* P. Poma, S. Riela\* and R. Noto.

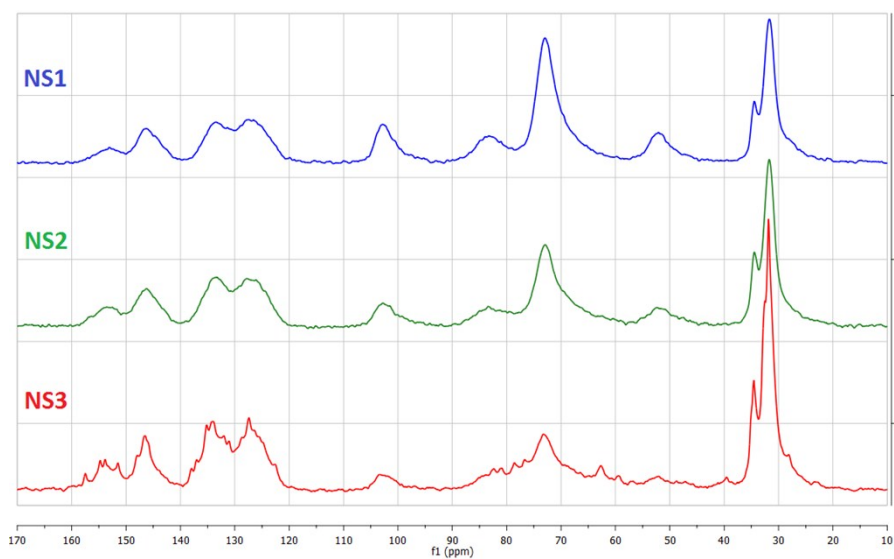

Figure S1.  $^{13}\text{C}\{^1\text{H}\}$  CP-MAS NMR of the nanosponges NS1-NS3.

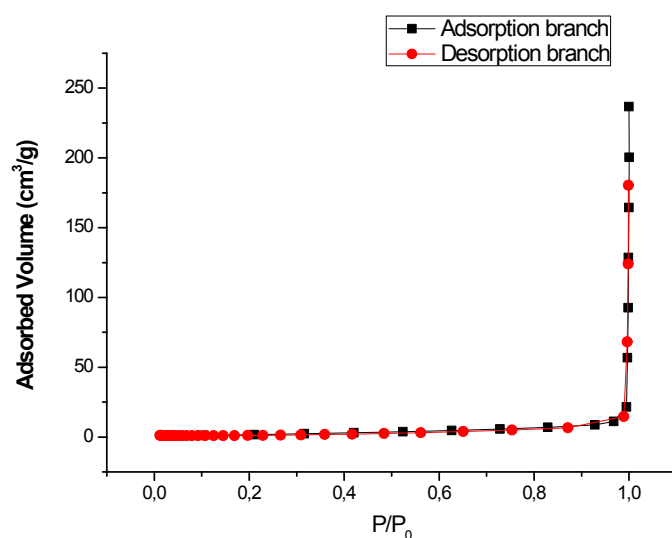

Figure S2.  $\text{N}_2$  adsorption-desorption isotherm of NS1.

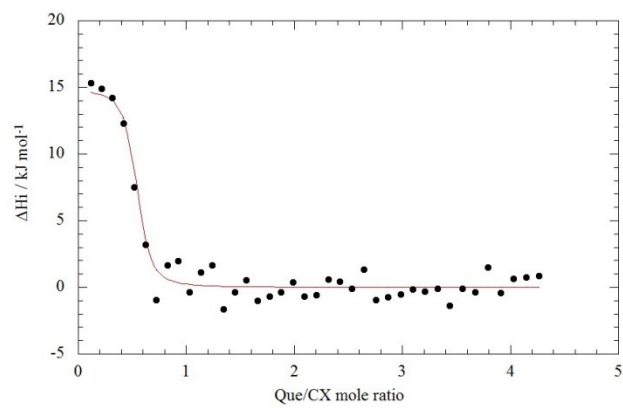

**Figure S.3.** ITC titration curve.

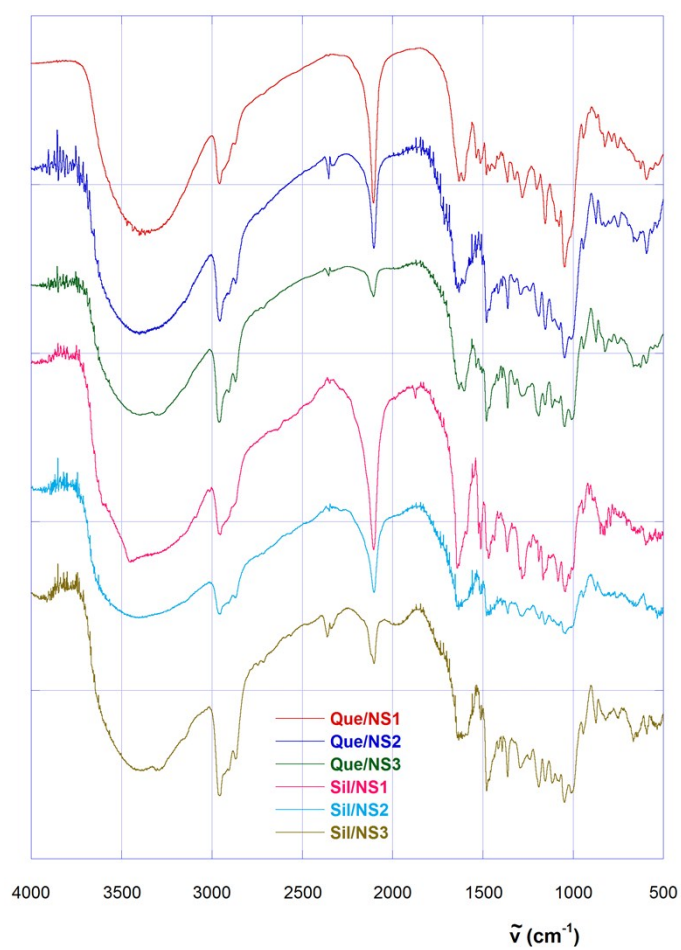

**Figure S.4.** FT-IR spectra of the nanocomposites between **Sil** and **Que** and NSs.

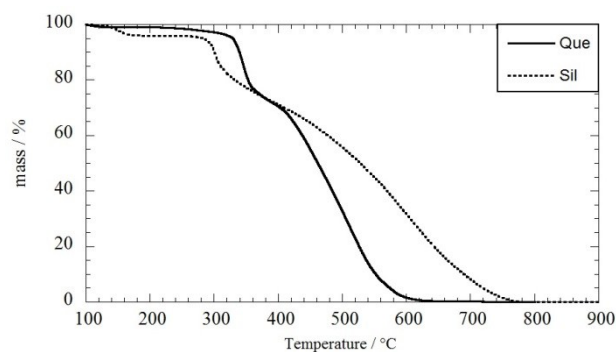

**Figure S.5.** Thermoanalytical curves of silibinin and quercetin.

The formation of 1:2 Que/ $\beta$ CD complexes has been demonstrated by fluorescence spectroscopy. The fluorescence data provided the equilibrium constant for the quercetin- $\beta$ CD inclusion complex formation by assuming the equilibria:

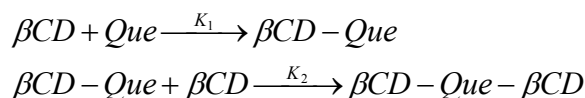

The overall association constant will be given by:

$$\beta = K_1 \cdot K_2 = \frac{[\beta CD - Que - \beta CD]}{[Que] \cdot [\beta CD]^2}$$

If  $[\beta CD] \gg [Que]$  the change in the fluorescence intensity as function of  $\beta CD$  concentration will be given by:

$$\Delta I = \frac{\Delta\alpha \cdot \beta \cdot Que_t \cdot [\beta CD]^2}{1 + \beta \cdot [\beta CD]^2}$$

where  $\Delta\alpha$  is the difference of emission quantum yield of free and complexed substrate,  $Que_t$  and  $[\beta CD]$  are the total concentration of quercetin and cyclodextrin, respectively.

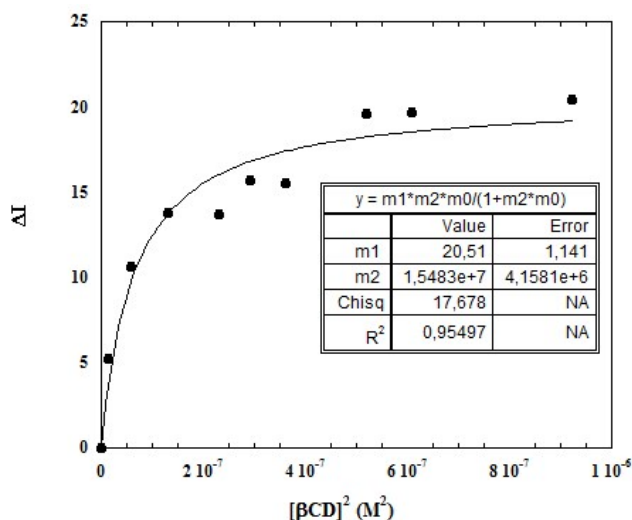

**Figure S.6.** Trend of the fluorescence intensity of the quercetin ( $1 \times 10^{-5}$  M) as function of  $\beta$ CD concentration ( $3 \times 10^{-4}$ - $1 \times 10^{-3}$  M).
